# Supplementary material
Source: PubMed Central journal article supplement (PMC4787959)
Supplement: galp793992.w1_default.pdf [file galp793992.w1_default.pdf]

## **Appendix: Members of the SU.FOL.OM3 Collaborative Group**

### **Coordinating centre**

Pilar Galan (principal investigator), Serge Hercberg (chair), Jacques Blacher, Sébastien Czernichow, Emmanuelle Kesse-Guyot, (U557 Inserm/U1125 Inra/Cnam/Paris 13, Bobigny).

### **Scientific committee**

Pierre Amarenco (Hôpital Bichat, Paris), Serge Briançon (CHU, Nancy), Eric Bruckert (CHU Pitié-Salpêtrière, Paris), Nicolas Danchin (Hôpital Georges Pompidou, Paris), Pierre Ducimetière (Inserm, Villejuif), Christian Funk-Brentano (CHU Pitié-Salpêtrière, Paris), François Gueyffier (CIC Hôpital Louis Pradel, Lyon), Jean-Louis Mas (Hôpital St Anne, Paris), François Paillard (CHU, Rennes), Christophe Tzourio (Inserm, Paris), Daniel Thomas (CHU Pitié-Salpêtrière, Paris).

### **End points committee**

Yves Cottin (Hôpital du Bocage, Dijon), Pierre Ducimetière (INSERM, Villejuif), Louis Guize (Hôpital Georges Pompidou, Paris), Jacques Henry (Clinique de l'Orangerie, Strasbourg), Jean-Jacques Monsuez (Hôpital René Muret-Bogottini, Sevran), François Paillard (CHU, Rennes), Marc Bataillard (Hôpital André Bouloche, Montbeliard), Gérard Besson (Hôpital Michallon, Grenoble), Thomas De Broucker (Hôpital Delafontaine, St Denis), Christophe Tzourio (Inserm, Paris), Thierry Rosolacci (Hôpital Sambre Avesnois, Maubeuge).

### **Scientific advisers**

Valérie Assuerus (Paris), Jacques Beaune (Lyon), Jacques Boulliat (Bourg en Bresse), Mireille Brochier (Tours), Jean-François Dartigues (Bordeaux), Jacque Delarue (Brest), Karine Demuth (Paris), Véronique Ducros (Grenoble), Alain Favier (Grenoble), Alain Grynberg (Chatenay Malabry), Jean-Louis Guéant (Nancy), Jean-Claude Guillaud (Dijon), Marc Hommel (Grenoble), Olivier Joyeux (Valence), Gérard Jullien (Marseille), Michel Krempf (Nantes), Denis Lairon (Marseille), François Laporte (Grenoble), Gisèle Le Moël (Paris), Didier Leys (Lille), Jean-René Lusson (Clermont-Ferrand), Nicole Moatti (Paris), Jean-Pierre Monassier (Mulhouse), Philippe Moulin (Lyon), Isabelle Quéré (Montpellier), Rosa-Maria Rodriguez (Nancy), Monique Romon-Rousseau (Lille), Marie-Pierre Sauvant (Clermont-Ferrand), Jean-Louis Schlienger (Strasbourg), Chantal Simon (Strasbourg), François Viallet (Aix en Provence).

### **Investigators**

(Listed in descending order of the number of randomised patients)

Lusson J.R. (Clermont Ferrand), Giroud M. (Dijon), Pierre B. (Marcy L Etoile), Henry J. (Strasbourg), De Broucker T. (Saint Denis), Borel M.L., Mansourati J., L'Her C. (Brest), Gueyffier F. (Lyon), Paillard F. (Rennes), Grimaud L.A. (Aix En Provence), Coulon P. (Sarrebouurg), Dagher H. (Avranches), Borrel E. (Saint Hilaire du Touvet), Gateau P. (Blaye), Marcaggi X., Amat G. (Vichy), Gladin M. (Haguenau), Cuenin C., Pruilhere-Vaquier S. (Durtol), Janin-Manificat L. (Beaune), Cardinaud P. (La Teste de Bush), Koenig A. (Schiltigheim), Bataillard M. (Montbeliard), Siche J.P. (Grenoble), Gommeaux A. (Henin Beaumont), Ronziere T. (Rennes), Leclercq F., Quéré I. (Montpellier), Choquet D. (Corbie), Besson G. (Grenoble), Rodier G. (Mulhouse), Lamy C. (Paris), Potard D. (Dijon), Dereeper O. (Calais), Dany F. (Limoges), Goepfert P.C. (Vandoeuvre Les Nancy), Herrmann A., Theolade R. (Wissembouurg), Negrier M. (Carmaux), Rosolacci T., Neuville V. (Maubeuge),

Piermont C. (Paris), Le Potier J. (Lorient), Ferriere M. (Montpellier), Diebold H. (Pont L'Abbé), Prat C., Devoize J.L. (Angouleme), Magne C, Guillon B. (Nantes), Cottin Y, Lhuillier I., Lebreuil C. (Dijon), Gaudy-Dansette M.C. (Marseille), Dechery T. (Montlucon), Boulesteix J.M. (Cahors), Roynard J.L. (Dax), Haury L. (Montceau Les Mines), Forest E. (Vannes), Dreyfus X. (Grenoble), Ennouchi D. (Niort), Levasseur M. (Orsay), Ledru F., Marinier-Roger S., Fressonnet R., Collet J.P., Beygui F. (Paris), Sander M. (Saint Germain En Laye), Du Roscoat P. (Nantes), Allegre C. (Nevers), Contant S. (Sens), Sghaier A. (La Reole), Boulet V. (L'Isle Sur La Sorgue), Moro P. (Marseille), Crousillat B. (Salon De Provence), Elias Z. (Toulon), Babuty D. (Tours), Saraceni O. (Altkirch), Tuambilangana A. (Cherbourg), Maillet-Vioud M. (Montlucon), Bareiss P. (Strasbourg), Falquier J.F. (Bergerac), Ahres S. (Colmar), Simorre R. (Montpellier), Baudet M. (Dax), Vautier F. (Guilherand Granges), Delahaye F. (Lyon), Falque B. (Marseille), Cornuau C. (Niort), Cambon H. (Poissy), Bittar M. (Strasbourg), Ducoudre M. (Biarritz), Le Doze F. (Caen), Martini L. (Carcassonne), Macian Montoro F. (Limoges), Payot L. (Paris), Delarche N. (Pau), Tassan P. (Poissy), Vasselon C. (Saint Etienne), Feger J.M. (Strasbourg), Davous P. (Argenteuil), Dautreppe J.N. (Bainville Sur Madon), Joseph J.P. (Bandol), Mazouz S. (Chelles), Schandrin C. (Clermont Ferrand), Maitre B. (Compiègne), Teinturier A. (Guilherand Granges), Laudy C. (Lamotte Beuvron), Ropars G. (Landivisiau), Cnudde B. (Loches), Lafontan J.F. (Montauban), Reygrobellet P. (Montpellier), Iliou M.C., Hamroun A., Morainville S. (Paris), Cahagne V., Leguerrier A.M. (Rennes), Golfier V. (Saint Briec), Chneker F. (Senlis), Fickl A. (Soissons), Requin J. (Thonon Les Bains), Rouhart F. (Brest), Edouard T. (Dieppe), Maureira J.J. (Dommartin Les Toul), Hassler P. (Haguenau), Dubois E. (Issoire), Pinot I., Joly P. (Marseille), Marazanof M. (Pessac), Bourdon J.L. (Saint Die), Martin D. (Saint Mandé), Reis J. (Sarreguemines), Asplanato M. (Villefranche Sur Mer), De La Bourdonnaye T. (Annecy), Coulomb J.P. (Boulogne Sur Mer), Corone S. (Briis Sous Forges), Dellinger A. (Chalon Sur Saone), Rieu L. (Chamalieres), Laine J.M. (Dinan), Jauffret B. (Marseille), Angibaud G. (Montauban), Cattan S. (Montfermeil), Prunier L. (Montreuil), Calvet D., Thomas D. (Paris), Petit-Perdrizet E. (Romans), Lavigne G. (Tours), Blasco L. (Ussel), Haouzi A. (Vandoeuvre Les Nancy), Deloizy M. (Boulogne Sur Mer), Hedoire F. (Caen), Gurau C. (Dreux), Fridrich Kunin M. (Fougeres), Poncelet P. (Henin Beaumont), Zekhnini K. (Mantes La Jolie), Feuillet L. (Marseille), Neuville V. (Maubeuge), Delhoume B. (Saint Junien), Heiligenstein D. (Thonon Les Bains), Mateo A. (Toulon), Blanc Lasserre K. (Valence), Chedeville F. (Vannes), Geslin P. (Angers), Adams C. (Argenteuil), Amevigbe J. (Beauvais), Louchart J.C. (Bethune), Hamon J.B. (Brest), Delomez G. (Brioude), Martinez M. (Dax), Maldonado P., Feltin M.P. (Echirolles), Razafindramboa A. (Elbeuf), Wassermann J.F. (Frejus), Lompre C., Grosclaude G., Page E. (Grenoble), Carre S. (Haguenau), Monnet De Lorbeau B. (Lamotte Beuvron), Muh P. (Lorient), Chevalier D. (Marseille), Heudron F. (Montlucon), Bortone, Heroum C. (Montpellier), Ache-Papillon C. (Oloron Sainte Marie), Weingrod M. (Plaisir), Tougeron A. (Poissy), Tournoux B. (Poitiers), Rovani X. (Pontault Combault), Montagne B. (Roubaix), Pouyet A. (Saint Briec), Dollet J.M. (Saint Die), Bernardeau C. (Suresnes), Doucet J. (Tonnerre), Faucheux J.M. (Agen), Canaple S., Lamy C., Godefroy O. (Amiens), Fraboulet J.Y. (Angers), Livartowski J. (Antony), Ray B., Benazza N. (Bar Le Duc), Vincent-Martin M. (Beaune), Lorentz C. (Belfort), Petitjean F. (Blois), Chemin P., Puel V. (Bordeaux), Brunschwig C. (Cannes), Garban T. (Carquefou), Buttard P. (Chalon Sur Saone), Ferrier A. (Clermont Ferrand), Julien B. (Dax), Mojon F. (Domont), Faurie A. (Grenoble), Bartoli S. (Hyeres), Necili Y. (La

Rochelle), Verret J.M. (Le Mans), Terdiman F. (Lempdes), Boutarin J. (Lyon), Heckenroth D. (Marseille), Pedeboscq G. (Mont De Marsan), Benainous O. (Neuilly Sur Seine), Mahagne M.H. (Nice), Soisson T. (Orleans), Verdier J.C. (Paris), Guillo P. (Rennes), Hossler V. (Reze), Adnet-Bonte C. (Roubaix), Michel L. (Saint Lo), Muller J.J., Soskin P. (Strasbourg), Flores Y.M. (Toulouse), Bonnaud I. (Tours), Leche J. (Vendome), Dubois J.M. (Villeurbanne), Payen I. (Annecy), Rosano J.P. (Avignon), Vialette J.C. (Beziers), Divisia A. (Chambery), Slama M., Colin P. (Clamart), Levai L. (Colmar), Detienne J.P. (Creil), Rondepierre P. (Dreux), Tricot O. (Dunkerque), Ardouin L. (Fosses), Corbel C. (Gourin), Bertrand B., Rossignol B. (Grenoble), Antelin C.H. (La Rochelle), Boeuf V. (Le Peage De Roussillon), Phan G. (Levallois Perret), Blum Decary I. (Lyon), Bensa P. (Marseille), Jellouli B. (Maubeuge), Canton P. (Mont De Marsan), Salas R. (Montauban), Doubrere J.F. (Montereau), Michaud P. (Montfermeil), Le Henaff J. (Nieuil L Espoir), Quillasi V. (Paray Le Monial), Maarek M., Kondo T., Leclercq J.F., Timsit S. (Paris), Baisset J.M., Hinault P. (Rennes), Elkohen M. (Roubaix), Madigand M. (Saint Briec), Pribat P. (Saint Jean De Luz), Dubuc-Lepetit L. (Saint Lo), Moulin P. (Saint Martin Des Champs), Pinzani A. (Sete), Ferrer J.C. (Tarascon), Fontaine (Toulouse), Maillot F., Peycher P. (Tours), Grosclaude M. (Valence), Bellon C. (Vienne), Mick G. (Voiron), Perez D. (Yerres), Ammor M. (Albi), Escande M. (Allauch), Muller J.P. (Antibes), Carcone B. (Antony), ,Evrard S., Rechtman D. (Argenteuil), Vagneur J.P. (Aubagne), Ellie E. (Bayonne), Zerhouni K. (Bobigny), Le Metayer P. (Bordeaux), Hardy S. (Briis Sous Forges), Terrasi J. (Calais), Perchicot E. (Cavaillon), Minier D. (Chalon Sur Saone), Duron P. (Chaville), Guy N., Clavelou P., Motreff P. (Clermont Ferrand), Baldauf E. (Colmar), Richardot C. (Crolles), Le Collen P., Gayou-Joyeux A. (Dax), Sharareh A., Denolle T. (Dinard), Calot P. (Fecamp), Le Floch S. (Frejus), Petit L., Pellet J. (Grenoble), Kallumannil J. (Hazebrouck), Pailloncy M. (Issoire), Rakotoarimanana D. (Jonzac), Tetard C. (La Garenne Colombes), Hamon R. (Laon), Alix D. (Lens), Thibault-Tanchou S. (Lille), Leman J.P. (Limoges), Chauplannaz G., David J.P. (Lyon), Savet J.F. (Macon), Duffaut P., (Marseille), Graverol D. (Maubeuge), Charbonni C. (Meulan), Truttman M., Fromentin S. (Montbeliard), Pasquinucci N. (Montigny Les Metz), Baietto C. (Montlucon), Milhaud D., Jhowry M. (Montpellier), Chbicheb M. (Narbonne), Gibelin P. (Nice), Aityahya K., Dassonville B., Besse F., Singer B., Beaufils P., Bensouda C., Sabbah L., Schaan X. (Paris), Peyrony A. (Parthenay), Lebrun-Grandie P. (Perigueux), Baroin J.P. (Pontault Combault), Painvin I., Deburghraeve V. (Rennes), Van De Walle J.P. (Rixheim), Cazier Y. (Rouen), Drawin T. (Saint Die), Elbeze J.P. (Saint Laurent Du Var), Benchimol H. (Saintes), Maillet J.J. (Sarlat), Fournier J.M. (Sete), Taupin J.M. (Soissons), Preiss J.P. (Strasbourg), Damiani M. (Thionville), Dodemant P. (Tours), Fichter P. (Valence), Cailleux X. (Vitre), Briancon-Citron A.M. (Volvic), Diadema B. (Allauch), Kieffer P. (Altkirch), Leborgne L. (Amiens), Furber A. (Angers), Gallet B. (Argenteuil), Beuriat P. (Beaune), Rakotoarison P., Bredin A. (Blaye), Artigou J.Y. (Bobigny), Dartigues J.F. (Bordeaux), Devos P. (Boulogne Sur Mer), Mahfoud A., Boisselier C. (Calais), Tannier C. (Carcassonne), Renglewicz-Destuynder C., Vuillemet F., Mettauer B. (Colmar), Pouliquen A., Bloch Y., Kerleau J. (Dieppe), Menassa M., Zeller M., Wolf J.E., Verges B. (Dijon), Gbonon J.M., Chabry E., Boiteux M.C. (Durtol), Tanitte M. (Grenoble), Dickele M.C. (Haguenu), Chalard N. (Issoire), Chappuis L. (Landerneau), Benaim C. (Le Grau Du Roi), Cazaux P. (Lorient), Mestrallet C., Ginon I., Beaune J., Andre-Fouet X. (Lyon), Amiar A. (Maubeuge) Richard P., Kubina J.M., Clerc C. (Montbeliard), Escaillas J.P., Bounekhla S. (Montlucon), Pierre Justin E. (Moulins), Cohen E. (Mulhouse), Beloucif L. (Neuilly Sur

Seine), Milliez P. (Paris), Neau J.P. (Poitiers), Monnier A. (Pont L'Abbé), Pinel J.F. (Rennes), Flork L. (Riom), Remy C. (Romans), Carriere T. (Schiltigheim), Heitz A. (Strasbourg), Thisse J.Y. (Thionville), Chodek-Hingray A., Bosser G., Vasse M.G. (Vandoeuvre Les Nancy), Kassiotis P. (Vannes).
